# Supplementary material for: An enzyme-free FRET nanoprobe for ultrasensitive ketamine detection based on ATP-fueled target recycling
Source: Royal Society of Chemistry journal article supplement (doi:10.1039/c9ra06139h), 2019-01-01
Supplement: c9ra06139h1.pdf [file c9ra06139h1.pdf]

**Supporting Information**

**for**

**An enzyme-free FRET Nanoprobe for ultrasensitive  
Ketamine detection based on ATP-fueled target recycling**

*Hong Chen,<sup>a,b</sup> Yun Zou,<sup>a,b</sup> Xue Jiang<sup>a</sup>, Fangqi Cao<sup>a</sup> and Wenbin Liu<sup>\*a</sup>*

<sup>a</sup> Shanghai Key laboratory of Crime Scene Evidence, Shanghai Research Institute of Criminal  
Science and Technology, 803 Zhongshan North 1st Road, Shanghai, 200083, P. R. China.

Tel: +86-21-22028361, Fax: +86-21-22028361, E-mail: wbliu1981@163.com

<sup>b</sup> They contributed equally.

**Table S1. Sequences of aptamers and Y-motif**

|                |                                                                                  |
|----------------|----------------------------------------------------------------------------------|
| Ket-Apt        | GGGGGGACGGGGCGGGACGTGGTGTGTGGTTCGTGTCCCC                                         |
| ATP-Apt        | ACCTGGGGGAGTATTGCGGAGGAAGGT                                                      |
| ssDNA          | GGGGACACGAACCACACACCACGTCCCGCCCCGTCCCCC                                          |
| Y <sub>a</sub> | CGTACTCCCGCTTTTTTTTTTTTACCTGGGGGAGTATTGCGGAGG<br>AAGGTGGGGGGACGGGGCGGGAGTACG-FAM |
| Y <sub>b</sub> | CACGGCGAATGTTTTTTACCTTCCTCCGCAATACTCCCCCAGGT                                     |
| Y <sub>c</sub> | SH-TTTTTTCTACTCCCGCCCCGTCCATTCGCCGTG                                             |

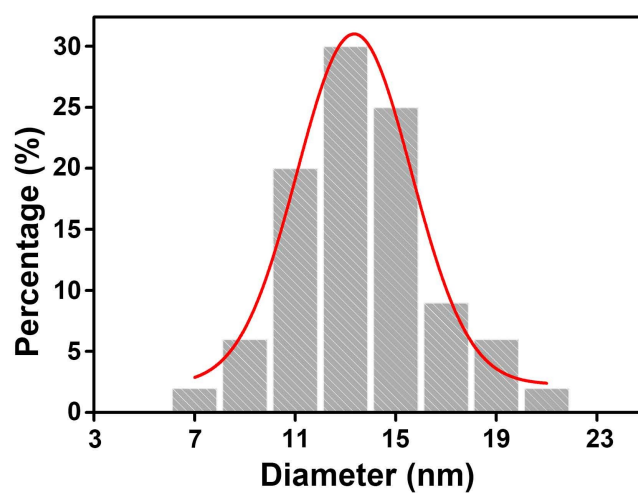

**Fig. S1** The size distribution histograms of AuNPs.

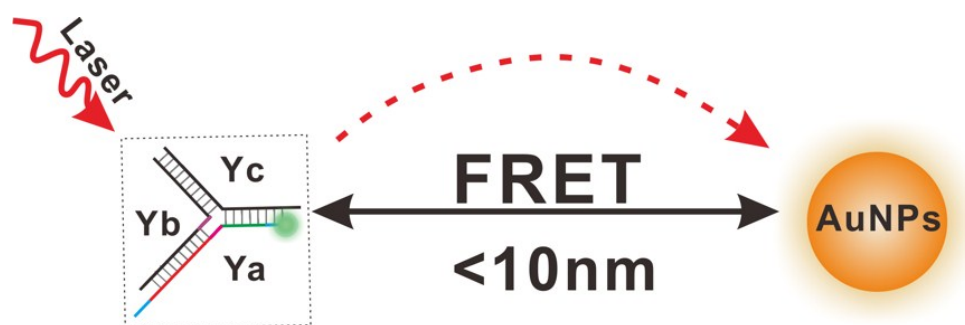

**Fig. S2** Mechanism of fluorescence resonance energy of transfer (FRET) occurring between Y-motif and AuNPs (excited at 492 nm and emitted at 520 nm).

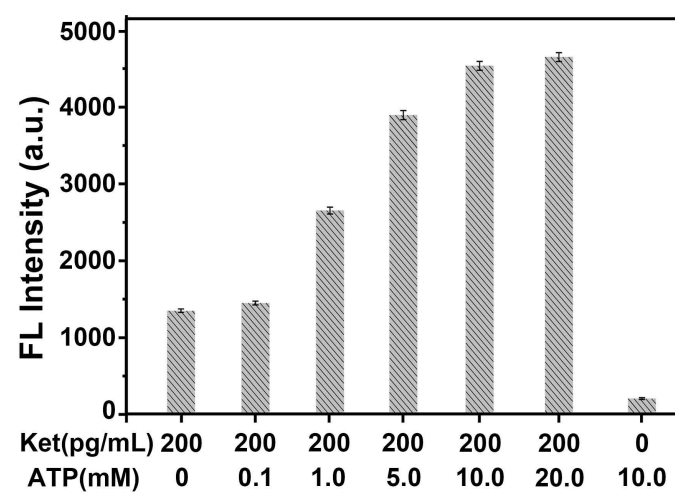

**Fig. S3** Influence of the ATP concentration on the detection effects for ketamine.

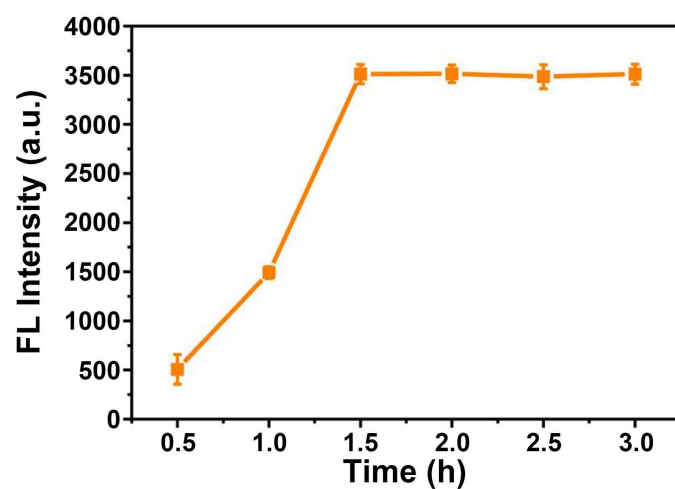

**Fig. S4** Kinetic characterization of the fluorescence recovery. The fluorescence of FAM was up to the highest intensity within 1.5 h. The concentrations of ketamine was 120 pg/mL. The ATP concentration used is 10 mM.

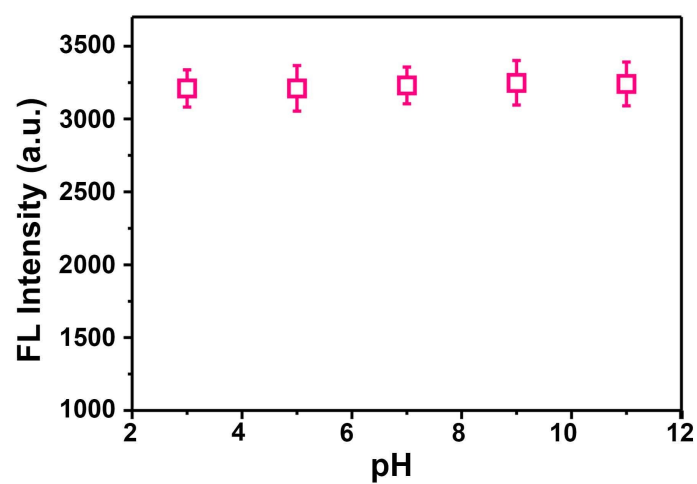

**Fig. S5.** Influence of pH on the response of the developed Y@AuNPs fluorescence nanoprobe for 105 pg/mL of ketamine.
